# Supplementary material
Source: publisher figshare collection journal article supplement (https://frontiersin.figshare.com/ndownloader/files/17448980)
Supplement: Supplementary file 1 [file 17448980]

|    | temp.<br>regime | fall<br>duration | spring<br>onset | winter<br>duration<br>(days) | <i>O.</i><br><i>cal.</i><br>(f:m) | <i>O.</i><br><i>col.</i><br>(f:m) | <i>O.</i><br><i>lig.</i><br>(f:m) | <i>O.</i><br><i>mon.</i><br>(f:m) | <i>O.</i><br><i>ter.</i><br>(f:m) | <i>O.</i><br><i>val.</i><br>(f:m) | <i>M.</i><br><i>lap.</i><br>(f:m) | <i>M.</i><br><i>rel.</i><br>(f:m) | total<br>(f:m) |
|----|-----------------|------------------|-----------------|------------------------------|-----------------------------------|-----------------------------------|-----------------------------------|-----------------------------------|-----------------------------------|-----------------------------------|-----------------------------------|-----------------------------------|----------------|
| 1) | cool            | short            | early           | 90                           | 1:7                               | 1:12                              | 11:14                             | 1:4                               | 3:1                               | 1:2                               | 1:2                               | 4:0                               | 23:42          |
| 2) | cool            | short            | late            | 120                          | 0:4                               | 3:6                               | 6:2                               | 1:2                               | 1:2                               | 0:0                               | 3:2                               | 3:0                               | 17:18          |
| 3) | cool            | long             | early           | 60                           | 1:4                               | 3:12                              | 18:20                             | 2:2                               | 1:4                               | 3:1                               | 1:1                               | 2:1                               | 31:45          |
| 4) | cool            | long             | late            | 90                           | 2:2                               | 4:7                               | 12:5                              | 0:3                               | 0:3                               | 1:2                               | 2:1                               | 3:0                               | 24:23          |
| 5) | warm            | short            | early           | 90                           | 2:6                               | 5:10                              | 14:23                             | 1:4                               | 1:3                               | 1:3                               | 4:1                               | 4:4                               | 32:54          |
| 6) | warm            | short            | late            | 120                          | 1:2                               | 4:7                               | 9:1                               | 0:3                               | 0:3                               | 0:0                               | 2:1                               | 3:1                               | 19:18          |
| 7) | warm            | long             | early           | 60                           | 2:3                               | 3:12                              | 13:20                             | 1:2                               | 1:1                               | 1:0                               | 5:1                               | 2:3                               | 28:42          |
| 8) | warm            | long             | late            | 90                           | 1:3                               | 2:10                              | 8:1                               | 0:4                               | 1:1                               | 1:2                               | 4:1                               | 1:2                               | 18:24          |

Table S1. Shows sample sizes of emerged bees in each treatment broken down by species and sex. Species abbreviations are as follows: *O. cal.* (*O. californica*), *O. col.* (*O. coloradensis*), *O. lig.* (*O. lignaria*), *O. mon.* (*O. montana*), *O. ter.* (*O. tersula*), *O. val.* (*O. vallicola*), *M. lap.* (*M. lapponica*), *M. rel.* (*M. relativa*). Ratios (i.e., f:m) represent the number of females compared to males of each species in each treatment. The total number of females compared to males in each treatment (i.e., combined across species) is shown in the last column.
